# Supplementary material for: Genome-wide association study of coronary artery disease among individuals with diabetes: the UK Biobank
Source: PubMed Central journal article supplement (PMC6133153; doi:10.1007/s00125-018-4686-z), 2018-07-12
Supplement: 125_2018_4686_MOESM1_ESM.pdf [file 125_2018_4686_MOESM1_ESM.pdf]

## **Electronic Supplementary Material**

**Genome-wide association study of coronary artery disease among individuals with diabetes:  
The UK Biobank**

**Fall *et al.***

## ESM Methods

### *Outcome definition*

CAD was defined as having a recorded death or hospitalization with primary or secondary diagnosis recorded with the International Statistical Classification of Diseases and Related Health Problems (ICD) version 10 codes I20, angina pectoris; I21, acute myocardial infarction; I22 subsequent ST elevation (STEMI) and non-ST elevation (NSTEMI) myocardial infarction; I23, certain current complications following ST elevation (STEMI) and non-ST elevation (NSTEMI) myocardial infarction; I24, other acute ischaemic heart diseases; or I25, chronic ischaemic heart disease. We further considered the following ICD-9 codes: 410, acute myocardial infarction; 411, other acute and subacute forms of ischaemic heart disease; 412, old myocardial infarction or 413 angina pectoris. We also considered those individuals as CAD that had the following surgical intervention recorded: K40, saphenous vein graft replacement of coronary artery; K41, other autograft replacement of coronary artery; K42, allograft replacement of coronary artery; K43 prosthetic replacement of coronary artery; K44, other replacement of coronary artery; K45, connection of thoracic artery to coronary artery; K46, other bypass of coronary artery; K49, transluminal balloon angioplasty of coronary artery; K50, other therapeutic transluminal operations on coronary artery; K75, percutaneous transluminal balloon angioplasty and insertion of stent into coronary artery. Further, individuals were classified as CAD if they reported angina pectoris or myocardial infarction at the verbal interview. If the participant was uncertain of the type of illness they had had, then they described it to the interviewer (a trained nurse) who attempted to place it within the coding tree. If the illness could not be located in the coding tree, the interviewer entered a free-text description of it. These free-text descriptions were subsequently examined by a doctor and, where possible, matched to entries in the coding tree. Free-text descriptions which could not be matched with very high probability have been marked as "unclassifiable". Individuals not fulfilling the above criteria were defined as not having CAD.

### *Pruning and conditional analysis*

We identified regions containing one or more SNPs with  $p < 5e-8$  ("index SNPs") by screening a window of 500kb adjacent to the first index SNP on each chromosome. If no additional SNPs were identified, the region was limited to that specific SNP, and screening was continued at the next index SNP. If additional index SNPs were present in this 500kb window, the window was expanded with 300kb from the last SNP, and we screened for additional SNPs with  $p < 5e-8$ , until there were no more SNPs with  $p < 5e-8$  within the next 300kb. From this pruning, a number of regions was identified containing one to several index SNPs. Within each region, the SNP with lowest p-value was assigned as the lead SNP. For each region, association analysis was repeated including all index SNPs in the region as well as the lead SNP from other regions at the same chromosome, and any SNP with  $p < 5e-8$  in this analysis was considered as an independent locus.

### *Gene-based analysis and pathway analysis*

We applied gene-based and gene-set pathway analyses with MAGMA v1.6<sup>2</sup> implemented in FUMA<sup>3</sup>, based on the SNP association results from our GWAS study. In the gene-based analysis, SNP association data were aggregated to the level of 18,205 protein coding genes. An F-test was used to compute the gene p-value based on a multiple linear principal components regression model.<sup>2</sup> The gene p-values and a computed gene correlation matrix were then used to perform gene-set analysis. Gene sets were obtained from the "C2 collection: Curated gene sets" and Goterms from the Molecular Signatures Database (MSigDB) v5.2<sup>4</sup> and a total of 10,894 gene sets were tested. For both gene-based and gene-set pathway analyses, Bonferroni-corrected p-value thresholds were used to denote significance.

**ESM Table 1.** Descriptive statistics of the 19,387 individuals with diabetes at baseline in the UK Biobank included in this study.

| <b>Ancestry</b>                  | <b>Variable</b>          | <b>Individuals with coronary artery disease</b> | <b>Individuals without coronary artery disease</b> |
|----------------------------------|--------------------------|-------------------------------------------------|----------------------------------------------------|
| <b>British, white</b>            | N                        | 3,968                                           | 11,698                                             |
|                                  | Age at visit             | 62.7 (5.6)                                      | 60.2 (7.0)                                         |
|                                  | Age at DM diagnosis      | 52.4 (12.2)                                     | 51.2 (12.6)                                        |
|                                  | Body mass index          | 32.1 (5.6)                                      | 31.4 (5.9)                                         |
|                                  | Systolic blood pressure  | 143 (20)                                        | 144 (18)                                           |
|                                  | Diastolic blood pressure | 79 (11)                                         | 82 (10)                                            |
|                                  | Male                     | 2,936 (74.0%)                                   | 7,037 (60.2%)                                      |
|                                  | Type 1 diabetes          | 268 (6.8%)                                      | 945 (8.1%)                                         |
|                                  | Insulin treatment        | 1,020 (25.9%)                                   | 2,396 (20.6%)                                      |
| <b>Europe, non-British white</b> | N                        | 478                                             | 1,372                                              |
|                                  | Age at visit             | 61.3 (6.9)                                      | 59.3 (7.2)                                         |
|                                  | Age at DM diagnosis      | 51.3 (12.9)                                     | 50.8 (12.0)                                        |
|                                  | Body mass index          | 32.7 (6.0)                                      | 31.6 (6.0)                                         |
|                                  | Systolic blood pressure  | 143 (19)                                        | 142 (18)                                           |
|                                  | Diastolic blood pressure | 80 (11)                                         | 82 (10)                                            |
|                                  | Male                     | 351 (73.4%)                                     | 796 (58.0%)                                        |
|                                  | Type 1 diabetes          | 38 (7.9%)                                       | 111 (8.1%)                                         |
|                                  | Insulin treatment        | 118 (24.9%)                                     | 287 (21.2%)                                        |
| <b>Black or Black British</b>    | N                        | 112                                             | 606                                                |
|                                  | Age at visit             | 61.1 (7.1)                                      | 56.9 (8.1)                                         |
|                                  | Age at DM diagnosis      | 50.7 (12.2)                                     | 48.0 (11.0)                                        |
|                                  | Body mass index          | 32.2 (6.4)                                      | 31.5 (6.0)                                         |
|                                  | Systolic blood pressure  | 146 (23)                                        | 144 (18)                                           |
|                                  | Diastolic blood pressure | 83 (11)                                         | 84 (11)                                            |
|                                  | Male                     | 50 (44.6%)                                      | 305 (50.3%)                                        |
|                                  | Type 1 diabetes          | 5 (4.5%)                                        | 16 (2.6%)                                          |
|                                  | Insulin treatment        | 32 (29.4%)                                      | 135 (22.6%)                                        |
| <b>Asian or Asian British</b>    | N                        | 356                                             | 797                                                |
|                                  | Age at visit             | 60.3 (7.4)                                      | 57.0 (7.8)                                         |
|                                  | Age at DM diagnosis      | 47.4 (12.3)                                     | 46.9 (12.7)                                        |
|                                  | Body mass index          | 29.2 (5.1)                                      | 28.6 (5.0)                                         |
|                                  | Systolic blood pressure  | 141 (20)                                        | 141 (18)                                           |
|                                  | Diastolic blood pressure | 79 (12)                                         | 82 (10)                                            |
|                                  | Male                     | 286 (80.3%)                                     | 472 (59.2%)                                        |
|                                  | Type 1 diabetes          | 14 (3.9%)                                       | 16 (2.0%)                                          |
|                                  | Insulin treatment        | 87 (24.9%)                                      | 119 (15.5%)                                        |

**ESM Table 2.** Source of data for definition of coronary artery disease in the main analysis of 15,666 individuals of white British ancestry with 3,968 coronary artery disease events. Each person is counted only once. For explanations of ICD-codes, see ESM Methods.

| <b>Source</b>                 | <b>Definition</b>             | <b>n</b> | <b>%</b> |
|-------------------------------|-------------------------------|----------|----------|
| <b>Death register</b>         | ICD10, I21-I25                | 252      | 6.4      |
| <b>Hospital register</b>      | ICD10, I21-I25; ICD9, 410-412 | 3041     | 76.6     |
| <b>Verbal interview</b>       | "Myocardial infarction"       | 122      | 3.1      |
| <b>Surgical interventions</b> | K40-K46, K49, K50, K75        | 2        | 0.05     |
| <b>Hospital register</b>      | ICD10, I20; ICD9, 413         | 342      | 8.6      |
| <b>Verbal interview</b>       | "Angina Pectoris"             | 209      | 5.3      |

**ESM Table 3.** Previously reported variants from the CARDIoGRAMplusC4D genetic consortium for CAD in the general population compared to association results in the UK Biobank diabetes population (n=15,666) and the UK Biobank population without diabetes at baseline (n=321,281)

| Genetic variant | Chr | Position, hg19 | Candidate gene             | Effect allele | Effect allele freq. | CARDIoGRAM        | UK Biobank [diabetes] | UK Biobank [without diabetes] |
|-----------------|-----|----------------|----------------------------|---------------|---------------------|-------------------|-----------------------|-------------------------------|
| rs3798220       | 6   | 160961137      | <i>SLC22A3-LPAL2-LPA*</i>  | C             | 0.02                | 1.42 (1.26, 1.60) | 1.38 (1.16, 1.65)     | 1.45 (1.36, 1.54)             |
| rs4977574       | 9   | 22098574       | <i>9p21</i>                | G             | 0.49                | 1.21 (1.19, 1.23) | 1.18 (1.12, 1.25)     | 1.15 (1.13, 1.17)             |
| rs3217992       | 9   | 22003223       | <i>9p21</i>                | T             | 0.37                | 1.14 (1.12, 1.16) | 1.12 (1.06, 1.19)     | 1.12 (1.10, 1.15)             |
| rs6725887       | 2   | 203745885      | <i>WDR12</i>               | C             | 0.12                | 1.14 (1.11, 1.18) | 1.08 (1.00, 1.16)     | 1.07 (1.04, 1.11)             |
| rs3918226       | 7   | 150690176      | <i>NOS3</i>                | T             | 0.08                | 1.14 (1.09, 1.19) | 0.99 (0.90, 1.10)     | 1.11 (1.07, 1.15)             |
| rs17114036      | 1   | 56962821       | <i>PPAP2B</i>              | A             | 0.91                | 1.13 (1.09, 1.17) | 1.08 (0.98, 1.18)     | 1.11 (1.07, 1.14)             |
| rs9982601       | 21  | 35599128       | <i>KCNE2 (gene desert)</i> | T             | 0.13                | 1.12 (1.08, 1.15) | 1.16 (1.08, 1.25)     | 1.10 (1.07, 1.13)             |
| rs646776        | 1   | 109818530      | <i>SORT1</i>               | T             | 0.78                | 1.11 (1.08, 1.13) | 1.18 (1.11, 1.26)     | 1.11 (1.08, 1.13)             |
| rs12526453      | 6   | 12927544       | <i>PHACTR1</i>             | C             | 0.67                | 1.10 (1.08, 1.12) | 1.07 (1.01, 1.13)     | 1.05 (1.03, 1.07)             |
| rs8042271       | 15  | 89574218       | <i>MFG8-ABHD2</i>          | G             | 0.96                | 1.10 (1.06, 1.14) | 0.96 (0.84, 1.11)     | 1.05 (1.00, 1.11)             |
| rs16986953      | 2   | 19942473       | <i>AK097927</i>            | A             | 0.07                | 1.09 (1.06, 1.12) | 1.14 (1.03, 1.26)     | 1.09 (1.05, 1.13)             |
| rs445925        | 19  | 45415640       | <i>APOE-APOC1</i>          | G             | 0.89                | 1.09 (1.05, 1.13) | 1.07 (0.99, 1.17)     | 1.10 (1.06, 1.13)             |
| rs501120        | 10  | 44753867       | <i>CXCL12</i>              | T             | 0.87                | 1.08 (1.06, 1.11) | 1.08 (1.00, 1.17)     | 1.05 (1.02, 1.08)             |
| rs17465637      | 1   | 222823529      | <i>MIA3</i>                | C             | 0.71                | 1.08 (1.06, 1.10) | 1.05 (0.99, 1.11)     | 1.07 (1.05, 1.09)             |
| rs7173743       | 15  | 79141784       | <i>ADAMTS7</i>             | T             | 0.54                | 1.08 (1.06, 1.10) | 1.07 (1.02, 1.13)     | 1.06 (1.04, 1.08)             |
| rs11206510      | 1   | 55496039       | <i>PCSK9</i>               | T             | 0.81                | 1.08 (1.05, 1.11) | 1.00 (0.93, 1.07)     | 1.04 (1.01, 1.07)             |
| rs12413409      | 10  | 104719096      | <i>CYP17A1-CNNM2-NT5C2</i> | G             | 0.92                | 1.08 (1.05, 1.11) | 1.09 (0.99, 1.21)     | 1.08 (1.04, 1.12)             |
| rs11556924      | 7   | 129663496      | <i>ZC3HC1</i>              | C             | 0.62                | 1.08 (1.05, 1.10) | 1.00 (0.95, 1.06)     | 1.05 (1.03, 1.07)             |
| rs579459        | 9   | 136154168      | <i>ABO</i>                 | C             | 0.21                | 1.08 (1.05, 1.10) | 1.01 (0.95, 1.08)     | 1.03 (1.01, 1.06)             |
| rs1122608       | 19  | 11163601       | <i>LDLR</i>                | G             | 0.75                | 1.08 (1.05, 1.10) | 1.02 (0.96, 1.08)     | 1.04 (1.02, 1.06)             |

|            |    |           |                           |   |      |                   |                   |                   |
|------------|----|-----------|---------------------------|---|------|-------------------|-------------------|-------------------|
| rs7692387  | 4  | 156635309 | <i>GUCY1A3</i>            | G | 0.82 | 1.07 (1.05, 1.10) | 1.08 (1.01, 1.16) | 1.06 (1.03, 1.08) |
| rs9515203  | 13 | 111049623 | <i>COL4A1/A2</i>          | T | 0.73 | 1.07 (1.05, 1.10) | 1.02 (0.97, 1.09) | 1.03 (1.00, 1.05) |
| rs56062135 | 15 | 67455630  | <i>SMAD3</i>              | C | 0.77 | 1.07 (1.05, 1.10) | 1.04 (0.98, 1.11) | 1.04 (1.02, 1.06) |
| rs1412444  | 10 | 91002927  | <i>LIPA</i>               | T | 0.34 | 1.07 (1.05, 1.09) | 1.04 (0.99, 1.10) | 1.04 (1.02, 1.06) |
| rs2075650  | 19 | 45395619  | <i>APOE-APOC1</i>         | G | 0.14 | 1.07 (1.04, 1.11) | 1.11 (1.03, 1.20) | 1.09 (1.06, 1.12) |
| rs9818870  | 3  | 138122122 | <i>MRAS</i>               | T | 0.17 | 1.07 (1.04, 1.10) | 1.04 (0.97, 1.12) | 1.07 (1.04, 1.09) |
| rs515135   | 2  | 21286057  | <i>APOB</i>               | C | 0.82 | 1.07 (1.04, 1.10) | 1.08 (1.01, 1.15) | 1.03 (1.01, 1.06) |
| rs3184504  | 12 | 111884608 | <i>SH2B3</i>              | T | 0.49 | 1.07 (1.04, 1.09) | 1.02 (0.97, 1.08) | 1.07 (1.05, 1.09) |
| rs974819   | 11 | 103660567 | <i>PDGFD</i>              | T | 0.29 | 1.07 (1.04, 1.09) | 1.05 (0.99, 1.11) | 1.06 (1.04, 1.08) |
| rs1878406  | 4  | 148393664 | <i>EDNRA</i>              | T | 0.14 | 1.06 (1.04, 1.09) | 1.04 (0.96, 1.12) | 1.07 (1.04, 1.10) |
| rs17087335 | 4  | 57838583  | <i>REST-NOA1</i>          | T | 0.18 | 1.06 (1.04, 1.09) | 1.01 (0.94, 1.08) | 1.05 (1.02, 1.07) |
| rs2505083  | 10 | 30335122  | <i>KIAA1462</i>           | C | 0.43 | 1.06 (1.04, 1.08) | 1.02 (0.97, 1.08) | 1.04 (1.02, 1.06) |
| rs2048327  | 6  | 160863532 | <i>SLC22A3-LPAL2-LPA</i>  | C | 0.4  | 1.06 (1.04, 1.08) | 1.08 (1.02, 1.14) | 1.07 (1.05, 1.10) |
| rs663129   | 18 | 57838401  | <i>PMAIP1-MC4R</i>        | A | 0.25 | 1.06 (1.04, 1.08) | 1.01 (0.95, 1.08) | 1.02 (1.00, 1.05) |
| rs1561198  | 2  | 85809989  | <i>VAMP5-VAMP8-GGCX</i>   | T | 0.46 | 1.06 (1.04, 1.08) | 1.06 (1.01, 1.12) | 1.05 (1.03, 1.07) |
| rs2047009  | 10 | 44539913  | <i>CXCL12</i>             | G | 0.52 | 1.06 (1.04, 1.08) | 1.03 (0.98, 1.09) | 1.04 (1.02, 1.06) |
| rs10840293 | 11 | 9751196   | <i>SWAP70</i>             | A | 0.56 | 1.06 (1.04, 1.08) | 0.98 (0.93, 1.03) | 1.05 (1.03, 1.07) |
| rs17464857 | 1  | 222762709 | <i>MIA3</i>               | T | 0.85 | 1.06 (1.03, 1.09) | 1.09 (1.01, 1.17) | 1.06 (1.03, 1.09) |
| rs264      | 8  | 19813180  | <i>LPL</i>                | G | 0.86 | 1.06 (1.03, 1.09) | 1.12 (1.03, 1.21) | 1.06 (1.03, 1.09) |
| rs273909   | 5  | 131667353 | <i>SLC22A4-SLC22A5</i>    | G | 0.12 | 1.06 (1.03, 1.09) | 1.02 (0.94, 1.10) | 1.02 (0.99, 1.05) |
| rs2023938  | 7  | 19036775  | <i>HDAC9</i>              | C | 0.1  | 1.06 (1.03, 1.09) | 1.01 (0.93, 1.10) | 1.07 (1.04, 1.11) |
| rs12190287 | 6  | 134214525 | <i>TCF21*</i>             | C | 0.63 | 1.06 (1.02, 1.10) | 1.05 (0.99, 1.11) | 1.06 (1.04, 1.08) |
| rs10953541 | 7  | 107244545 | <i>7q22</i>               | C | 0.75 | 1.05 (1.03, 1.08) | 1.02 (0.96, 1.08) | 1.02 (0.99, 1.04) |
| rs4773144  | 13 | 110960712 | <i>COL4A1/A2</i>          | G | 0.44 | 1.05 (1.03, 1.08) | 1.01 (0.96, 1.06) | 1.03 (1.01, 1.05) |
| rs10947789 | 6  | 39174922  | <i>KCNK5</i>              | T | 0.77 | 1.05 (1.03, 1.08) | 0.99 (0.93, 1.05) | 1.03 (1.00, 1.05) |
| rs964184   | 11 | 116648917 | <i>ZNF259-APOA5-APOA1</i> | G | 0.14 | 1.05 (1.03, 1.08) | 0.99 (0.92, 1.07) | 1.05 (1.02, 1.08) |
| rs17514846 | 15 | 91416550  | <i>FURIN-FES</i>          | A | 0.47 | 1.05 (1.03, 1.07) | 1.07 (1.01, 1.13) | 1.08 (1.06, 1.10) |
| rs4845625  | 1  | 154422067 | <i>IL6R</i>               | T | 0.42 | 1.05 (1.03, 1.07) | 1.02 (0.96, 1.07) | 1.03 (1.01, 1.05) |

|            |    |           |                        |   |      |                   |                   |                   |
|------------|----|-----------|------------------------|---|------|-------------------|-------------------|-------------------|
| rs6544713  | 2  | 44073881  | <i>ABCG5-ABCG8</i>     | T | 0.32 | 1.05 (1.03, 1.07) | 1.02 (0.97, 1.08) | 1.05 (1.03, 1.07) |
| rs216172   | 17 | 2126504   | <i>SMG6</i>            | C | 0.36 | 1.05 (1.03, 1.07) | 1.01 (0.96, 1.07) | 1.03 (1.01, 1.05) |
| rs2954029  | 8  | 126490972 | <i>TRIB1</i>           | A | 0.54 | 1.04 (1.03, 1.06) | 1.02 (0.97, 1.08) | 1.05 (1.03, 1.07) |
| rs11203042 | 10 | 90989109  | <i>LIPA</i>            | T | 0.45 | 1.04 (1.02, 1.06) | 1.03 (0.97, 1.08) | 1.03 (1.01, 1.05) |
| rs9319428  | 13 | 28973621  | <i>FLT1</i>            | A | 0.3  | 1.04 (1.02, 1.06) | 1.04 (0.98, 1.10) | 1.02 (1.00, 1.04) |
| rs7136259  | 12 | 90081188  | <i>ATP2B1</i>          | T | 0.42 | 1.04 (1.02, 1.06) | 1.00 (0.95, 1.06) | 1.01 (0.99, 1.03) |
| rs46522    | 17 | 46988597  | <i>UBE2Z</i>           | T | 0.54 | 1.04 (1.02, 1.06) | 1.04 (0.99, 1.10) | 1.02 (1.00, 1.04) |
| rs2895811  | 14 | 100133942 | <i>HHIPL1</i>          | C | 0.42 | 1.04 (1.02, 1.06) | 1.02 (0.97, 1.08) | 1.03 (1.01, 1.05) |
| rs4252120  | 6  | 161143608 | <i>PLG</i>             | T | 0.71 | 1.03 (1.01, 1.06) | 1.07 (1.01, 1.14) | 1.05 (1.03, 1.07) |
| rs2252641  | 2  | 145801461 | <i>ZEB2-ACO74093.1</i> | C | 0.45 | 1.03 (1.01, 1.05) | 1.01 (0.96, 1.06) | 1.03 (1.01, 1.05) |
| rs12936587 | 17 | 17543722  | <i>RAI1-PEMT-RASD1</i> | G | 0.53 | 1.03 (1.01, 1.05) | 1.08 (1.02, 1.13) | 1.03 (1.01, 1.05) |
| rs17609940 | 6  | 35034800  | <i>ANKS1A</i>          | G | 0.78 | 1.03 (1.00, 1.05) | 1.06 (0.99, 1.13) | 1.02 (1.00, 1.05) |
| rs6903956  | 6  | 11774583  | <i>ADTRP-C6orf105</i>  | A | 0.38 | 1.00 (0.98, 1.02) | 0.98 (0.93, 1.03) | 1.00 (0.98, 1.02) |

**ESM Table 4.** Sensitivity analysis of top findings using alternate diabetes and CAD definitions.

| <b>SNP</b> | <b>DM classification</b>           | <b>outcome</b>   | <b>N cases</b> | <b>N controls</b> | <b>OR (95% CI)</b> | <b>P</b>               |
|------------|------------------------------------|------------------|----------------|-------------------|--------------------|------------------------|
| rs74617384 | Probable and Possible Type 1 and 2 | CAD incl. angina | 3,968          | 11,698            | 1.38 (1.26, 1.51)  | 3.2x10 <sup>-12</sup>  |
|            |                                    | Excluding angina | 3,293          | 11,698            | 1.41 (1.28, 1.56)  | 4.2x10 <sup>-12</sup>  |
|            | Probable Type 1 and 2              | CAD incl. angina | 3,258          | 10,303            | 1.39 (1.26, 1.53)  | 8.3x10 <sup>-11</sup>  |
|            |                                    | Excluding angina | 2,671          | 10,303            | 1.43 (1.28, 1.59)  | 6.3 x10 <sup>-11</sup> |
|            | Probable Type 2                    | CAD incl. angina | 3,053          | 9,503             | 1.38 (1.25, 1.53)  | 6.7x10 <sup>-10</sup>  |
|            |                                    | Excluding angina | 2,489          | 9,503             | 1.42 (1.27, 1.59)  | 4.3x10 <sup>-10</sup>  |
| rs10811652 | Probable and Possible Type 1 and 2 | CAD incl. angina | 3,968          | 11,698            | 1.19 (1.13, 1.26)  | 6.0x10 <sup>-11</sup>  |
|            |                                    | Excluding angina | 3,293          | 11,698            | 1.23 (1.16, 1.30)  | 2.0x10 <sup>-12</sup>  |
|            | Probable Type 1 and 2              | CAD incl. angina | 3,258          | 10,303            | 1.21 (1.14, 1.28)  | 2.2x10 <sup>-10</sup>  |
|            |                                    | Excluding angina | 2,671          | 10,303            | 1.24 (1.17, 1.32)  | 1.5x10 <sup>-11</sup>  |
|            | Probable Type 2                    | CAD incl. angina | 3,053          | 9,503             | 1.20 (1.13, 1.27)  | 4.6x10 <sup>-9</sup>   |
|            |                                    | Excluding angina | 2,489          | 9,503             | 1.24 (1.16, 1.32)  | 2.1x10 <sup>-10</sup>  |



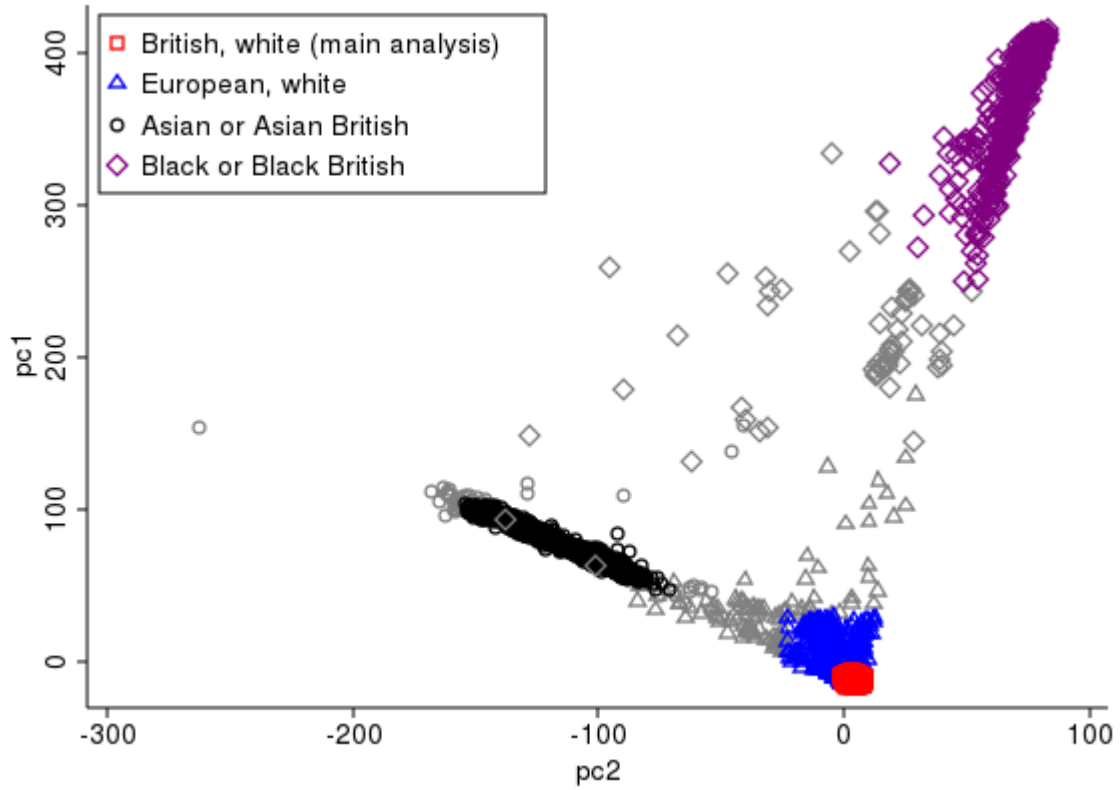

**ESM Figure 1.** Scatterplot of the first two components from a principal component analysis of individuals with diabetes from the UK Biobank, where individuals of self-reported white European background are shown with triangles, “Asian or Asian British” in circles and “Black or Black British” with diamond symbols. Excluded individuals are shown in grey.

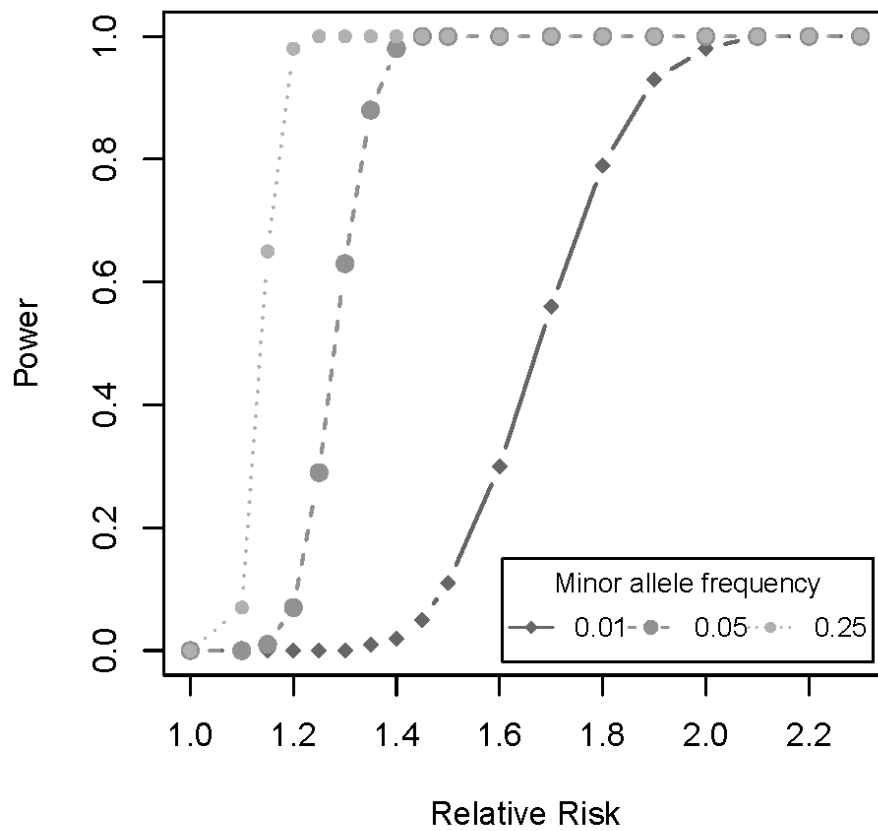

**ESM Figure 2.** Estimated power using the Genetic Association Study Power Calculator derived from the CaTS power calculator<sup>5</sup> to detect genetic variants at various relative effect sizes per allele, and minor allele frequencies, in our study of 3,968 CAD cases and 11,698 controls assuming an additive model of inheritance and a genome-wide significance threshold of  $p < 5 \times 10^{-8}$ .

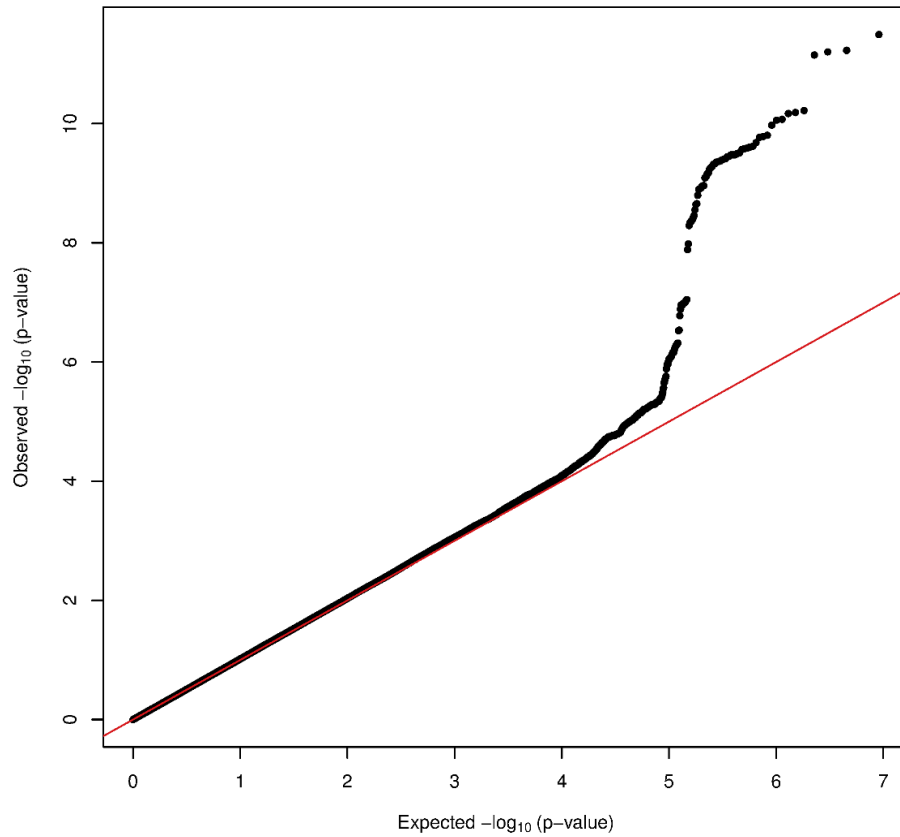

**ESM Figure 3.** Quantile-quantile plot illustrating the distribution of p-values across the genome compared to the expected distribution for our genome-wide association study of CAD (3,968 CAD cases and 11,698 controls) in participants with diabetes in UK Biobank. No indication of a systematic genomic inflation was observed ( $\lambda=1.017$ ).

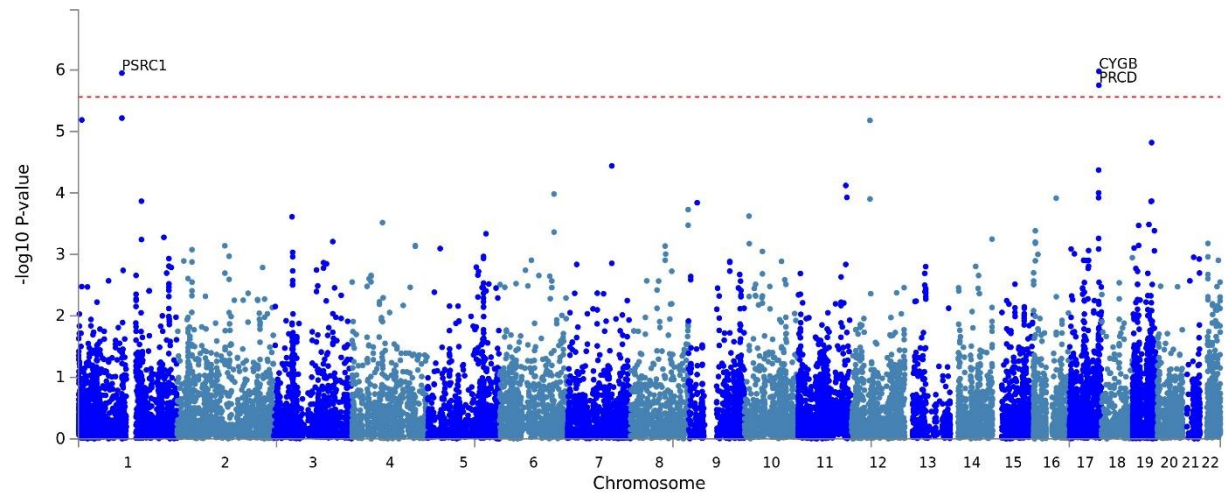

**ESM Figure 4.** Results from a gene-based analysis (MAGMA) suggesting association of *PSRC1*, *CYGB* and *PRCD* genes with CAD in patients with diabetes. Each tested gene is visualized as a dot with location on the genome on the x-axis and  $-\log_{10}$ -transformed p-values on the y-axis. Genome-wide significance (red dashed line in the plot) was defined at  $P = 0.05/18,205$  (number of tested genes) =  $2.746e-6$ .

## References

1. Bycroft C, Freeman C, Petkova D, et al. Genome-wide genetic data on ~500,000 UK Biobank participants. *bioRxiv*. 2017.
2. de Leeuw CA, Mooij JM, Heskes T, Posthuma D. MAGMA: generalized gene-set analysis of GWAS data. *PLoS Comput Biol*. 2015;11(4):e1004219.
3. Watanabe K, Taskesen E, van Bochoven A, Posthuma D. Functional mapping and annotation of genetic associations with FUMA. *Nat Commun*. 2017;8(1):1826.
4. Subramanian A, Tamayo P, Mootha VK, et al. Gene set enrichment analysis: a knowledge-based approach for interpreting genome-wide expression profiles. *Proc Natl Acad Sci U S A*. 2005;102(43):15545-15550.
5. Skol AD, Scott LJ, Abecasis GR, Boehnke M. Joint analysis is more efficient than replication-based analysis for two-stage genome-wide association studies. *Nature genetics*. 2006;38(2):209-213.
